# Supplementary material
Source: PubMed Central journal article supplement (PMC10541485)
Supplement: mmc1.pdf [file mmc1.pdf]

**Biophysical Journal, Volume 122**

## **Supplemental information**

### **Nonmuscle myosin 2 filaments are processive in cells**

**Eric A. Vitriol, Melissa A. Quintanilla, Joseph J. Tidei, Lee D. Troughton, Abigail Cody, Bruno A. Cisterna, Makenzie L. Jane, Patrick W. Oakes, and Jordan R. Beach**

## SUPPLEMENTARY MATERIAL

Table 1

| Construct   | Retrograde Velocity (nm/s) | # of Retrograde Events | $R^2$ of fit | Anterograde Velocity (nm/s) | # of Anterograde Events | $R^2$ of fit |
|-------------|----------------------------|------------------------|--------------|-----------------------------|-------------------------|--------------|
| EGFP-RLC    | -34.5 ± 14.0               | 1241                   | 0.900        | 61.8 ± 31.7                 | 1343                    | 0.576        |
| 2A-Halo     | -50.1 ± 16.3               | 5296                   | 0.934        | 71.0 ± 35.0                 | 1826                    | 0.854        |
| 2B-Halo     | -57.3 ± 19.8               | 4436                   | 0.942        | 57.5 ± 21.7                 | 888                     | 0.859        |
| Profilin-OE | -37.1 ± 14.4               | 1848                   | 0.927        | 53.1 ± 25.9                 | 1012                    | 0.903        |
| GFP Control | -38.0 ± 12.7               | 1418                   | 0.961        | 51.8 ± 22.5                 | 783                     | 0.881        |

## MOVIE LEGENDS

### Movie S1

CAD cell expressing RLC-iRFP from Fig. 1A. Scale bar is 5  $\mu$ m and time is in mm:ss. Cell was imaged at 3 Hz and playback is at 30 fps.

### Movie S2

CAD cell expressing RLC-iRFP region of interest from Fig. 1C. Cell was imaged at 3 Hz and playback is at 30 fps.

### Movie S3

CAD cell expressing RLC-iRFP and FTractin-Neon from Fig. 1F. Scale bar is 5  $\mu$ m and time is in mm:ss. Cell was imaged at 1.5 Hz and playback is at 30 fps.

### Movie S4

CAD cell expressing RLC-iRFP and FTractin-Neon region of interest from Fig. 1G. Cell was imaged at 1.4 Hz and playback is at 15 fps.

### Movie S5

CAD cell expressing EGFP-NM2A from Fig. 2A. Scale bar is 5  $\mu$ m and time is in mm:ss. Cell was imaged at 3 Hz and playback is at 40 fps.

### Movie S6

CAD cell expressing EGFP-NM2A and FTractin-mApple from Fig. 2D. Scale bar is 5  $\mu$ m and time is in mm:ss. Cell was imaged at 1.25 Hz and playback is at 15 fps.

### Movie S7

CAD cell expressing NM2A-Halo treated with JL at time t=0, from Fig. 3B,D. Scale bar is 5  $\mu$ m and time is in mm:ss. Cell was imaged at 2 Hz and playback is at 30 fps.

### Movie S8

CAD cell with either PFN1-KO (left), GFP-control (middle) or GFP-PFN1 (right) expressing NM2A-Halo from Fig. 4A,C,E. Scale bar is 5  $\mu$ m and time is in mm:ss. Cell was imaged at 5 Hz and playback is at 30 fps.

### Movie S9

CAD cell expressing NM2A-Halo (top) or NM2B-Halo (bottom) from Fig. 5D,G. Scale bar is 2  $\mu$ m and time is in mm:ss. Cell was imaged at 2 Hz and playback is at 30 fps.

### **Movie S10**

Subnuclear stress fibers imaged in a primary EGFP-NM2A knock-in MEF from Fig. 6A. Scale bar is is 5  $\mu\text{m}$  and time is in mm:ss. Cell was imaged at 1 Hz and playback is at 20 fps.

### **Movie S11**

Ventral lamella imaged in a primary EGFP-NM2A knock-in MEF from Fig. 6C. Scale bar is is 5  $\mu\text{m}$  and time is in mm:ss. Cell was imaged at 0.4 Hz and playback is at 20 fps.
